# Supplementary material for: Self assembly of nanostructured hexagonal cobalt dendrites: an efficient anti-coliform agent
Source: Royal Society of Chemistry journal article supplement (doi:10.1039/c3ra45900d), 2013-12-06
Supplement: c3ra45900d.pdf [file c3ra45900d.pdf]

## SUPPORTING INFORMATION

### Self Assembly of Nanostructured Hexagonal Cobalt Dendrites: An Efficient Antibacterial, Anti-coliform and Anti-Biofilm Agent\*\*

Rajendra P. Panmand,<sup>† a,c</sup> Rajendra H. Patil,<sup>† b</sup> Bharat B. Kale,<sup>a \*</sup> Latesh K. Nikam,<sup>a</sup> Milind V. Kulkarni,<sup>a</sup> Kashinath R. Patil,<sup>d</sup> Dipalee K. Thombre,<sup>b</sup> Wasudev N. Gade,<sup>b</sup> Suresh W. Gosavi.<sup>b</sup>

**S I:** XRD of cobalt nanoparticles synthesized using (a) cobalt chloride and (b) cobalt acetate at 5V.

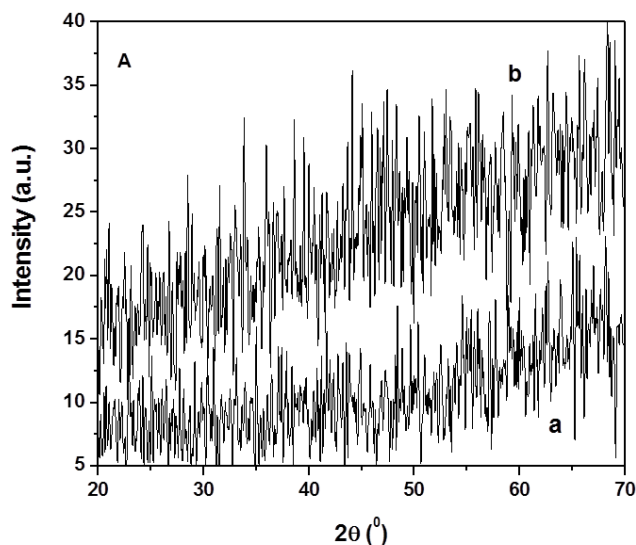

Figure SI: X-ray powder diffraction pattern of cobalt nanoparticles at applied voltage 5 V for 30 seconds using cobalt acetate (a) and  $\text{CoCl}_2$  (b).

**S II:** EDS of cobalt nanoparticles synthesized using (a) cobalt chloride and (b) cobalt acetate.

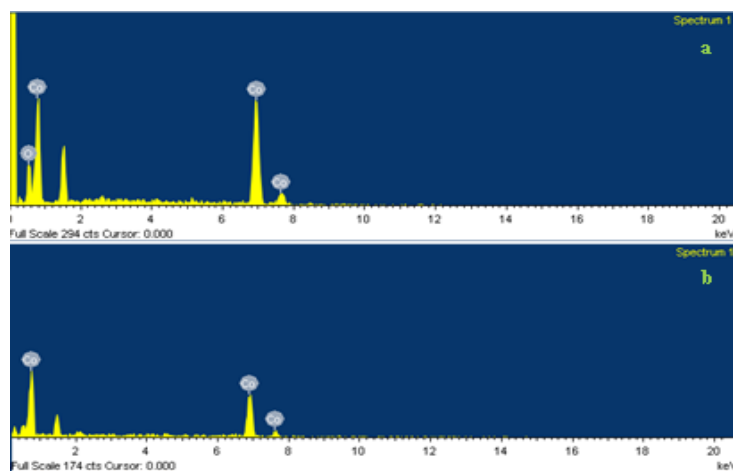

**Figure 2:** EDS of cobalt nanoparticles synthesized using (a) cobalt chloride and (b) cobalt acetate.

### S III . MBC of the as-synthesized Co-DNDs by using $\text{CoCl}_2$ as precursor

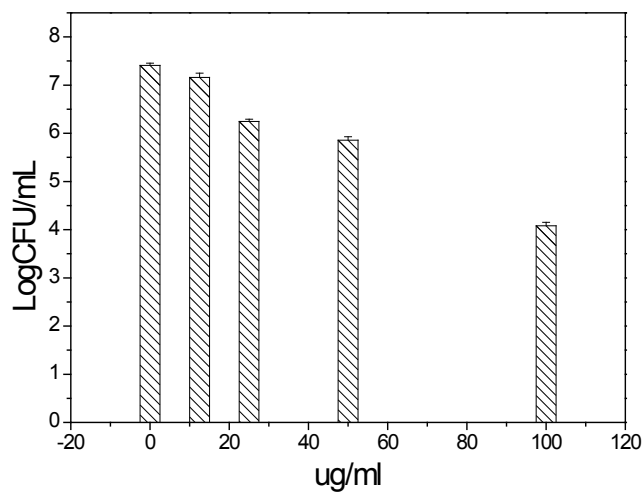

MBC of the as-synthesized Co-DNDs by using  $\text{CoCl}_2$  as a precursor ion. Note a 3log reduction of cells *B subtilis* occurred at 100  $\mu\text{g/mL}$  of Co-DNDs.
